# Supplementary material
Source: PubMed Central journal article supplement (PMC1783123)
Supplement: pnas_0610362104_1.pdf [file pnas_0610362104_1.pdf]

**Table 3. Regression coefficients and 95% confidence intervals from the linear regression models predicting Fibrinogen**

|                                         |                           | BASELINE<br>Bivariate analysis | MODEL 1<br>Early-Life Risks | MODEL 2<br>Adult Stress | MODEL 3<br>Adult Health/Behav | MODEL 4<br>Full     |
|-----------------------------------------|---------------------------|--------------------------------|-----------------------------|-------------------------|-------------------------------|---------------------|
| <b>CHILDHOOD MALTREATMENT</b>           |                           |                                |                             |                         |                               |                     |
|                                         | no                        | 0                              | 0                           | 0                       | 0                             | 0                   |
|                                         | probable                  | 0.07 [-0.02;0.15]              | 0.05 [-0.04;0.13]           | 0.07 [-0.02;0.15]       | 0.03 [-0.05;0.11]             | 0.01 [-0.07;0.09]   |
|                                         | definite                  | 0.18 [0.05;0.31] **            | 0.12 [-0.01;0.25] †         | 0.13 [0.01;0.26] *      | 0.11 [-0.01;0.24] †           | 0.08 [-0.05;0.21]   |
| <b>CO-OCCURRING EARLY-LIFE RISKS</b>    |                           |                                |                             |                         |                               |                     |
| Low birth weight                        |                           | 0.08 [-0.10;0.25]              | 0.03 [-0.14;0.20]           | -                       | -                             | 0.03 [-0.13;0.20]   |
| Child SES                               | <i>low</i>                | 0.27 [0.15;0.40]               | 0.24 [0.11;0.37]            | -                       | -                             | 0.15 [0.02;0.27]    |
|                                         | <i>medium</i>             | 0.09 [-0.01;0.19]              | 0.09 [-0.01;0.19]           |                         |                               | 0.06 [-0.04;0.16]   |
|                                         | <i>high</i>               | 0                              | 0                           |                         |                               | 0                   |
| Low child IQ                            |                           | 0.09 [-0.02;0.20]              | 0.04 [-0.07;0.16]           | -                       | -                             | -0.02 [-0.13;0.10]  |
| <b>ADULT STRESS INDICATORS</b>          |                           |                                |                             |                         |                               |                     |
| SES                                     | <i>low</i>                | 0.13 [0.04;0.22]               | -                           | 0.09 [0.00;0.18]        | -                             | 0.05 [-0.05;0.14]   |
|                                         | <i>medium</i>             | 0.06 [-0.03;0.15]              |                             | 0.06 [-0.03;0.14]       |                               | 0.03 [-0.05;0.12]   |
|                                         | <i>high</i>               | 0                              |                             | 0                       |                               | 0                   |
| Major Depression                        |                           | 0.13 [0.03;0.23]               | -                           | 0.04 [-0.07;0.15]       | -                             | 0.07 [-0.04;0.17]   |
| High perceived stress                   |                           | 0.12 [0.04;0.20]               | -                           | 0.07 [-0.02;0.16]       | -                             | 0.02 [-0.07;0.11]   |
| <b>ADULT HEALTH AND HEALTH BEHAVIOR</b> |                           |                                |                             |                         |                               |                     |
| CV risk cluster                         |                           | 0.45 [0.36;0.55]               | -                           | -                       | 0.45 [0.36;0.55]              | 0.44 [0.34;0.54]    |
| Smoking                                 | <i>non-smoker</i>         | 0                              | -                           | -                       | 0                             | 0                   |
|                                         | <i>up to 10 / day</i>     | 0.02 [-0.08;0.12]              |                             |                         | 0.05 [-0.05;0.14]             | 0.04 [-0.05;0.14]   |
|                                         | <i>11 to 20 / day</i>     | 0.09 [0.00;0.19]               |                             |                         | 0.08 [-0.01;0.17]             | 0.06 [-0.04;0.16]   |
|                                         | <i>more than 20 / day</i> | 0.17 [0.00;0.34]               |                             |                         | 0.21 [0.05;0.38]              | 0.18 [0.01;0.34]    |
| Physical activity                       | <i>light activity</i>     | 0.15 [0.04;0.25]               | -                           | -                       | 0.09 [-0.02;0.19]             | 0.10 [-0.01;0.20]   |
|                                         | <i>moderate activity</i>  | 0.08 [-0.02;0.19]              |                             |                         | 0.02 [-0.08;0.12]             | 0.04 [-0.06;0.15]   |
|                                         | <i>hard activity</i>      | 0.05 [-0.05;0.16]              |                             |                         | 0.03 [-0.07;0.13]             | 0.03 [-0.07;0.14]   |
|                                         | <i>very hard activity</i> | 0                              |                             |                         | 0                             | 0                   |
| Diet (fruit,veg intake)                 | <i>very low</i>           | -0.02 [-0.13;0.09]             | -                           | -                       | 0.00 [-0.11;0.11]             | 0.02 [-0.10;0.13]   |
|                                         | <i>low</i>                | 0.01 [-0.10;0.12]              |                             |                         | 0.03 [-0.07;0.13]             | 0.05 [-0.06;0.15]   |
|                                         | <i>high</i>               | 0.08 [-0.04;0.20]              |                             |                         | 0.05 [-0.06;0.16]             | 0.08 [-0.03;0.20]   |
|                                         | <i>very high</i>          | 0                              |                             |                         | 0                             | 0                   |
| <b>OTHERS</b>                           |                           |                                |                             |                         |                               |                     |
| Male sex                                |                           | -0.24 [-0.31;-0.17]            | -0.22 [-0.29;-0.14]         | -0.22 [-0.29;-0.14]     | -0.24 [-0.31;-0.16]           | -0.20 [-0.28;-0.12] |
| Use of anti-inflammatory                |                           | 0.05 [-0.03;0.13]              | 0.05 [-0.03;0.13]           | 0.06 [-0.02;0.14]       | 0.06 [-0.02;0.13]             | 0.06 [-0.01;0.14]   |

\*\* , P < 0.01; \* , P < 0.05; † , P < 0.10
