# Supplementary material
Source: PubMed Central journal article supplement (PMC1783123)
Supplement: pnas_0610362104_2.pdf [file pnas_0610362104_2.pdf]

**Table 4. Regression coefficients and 95% confidence intervals from the linear regression models predicting WBC**

|                                         |                           | BASELINE<br>Bivariate analysis | MODEL 1<br>Early-Life Risks | MODEL 2<br>Adult Stress | MODEL 3<br>Adult Health/Behav | MODEL 4<br>Full     |
|-----------------------------------------|---------------------------|--------------------------------|-----------------------------|-------------------------|-------------------------------|---------------------|
| <b>CHILDHOOD MALTREATMENT</b>           |                           |                                |                             |                         |                               |                     |
|                                         | no                        | 0                              | 0                           | 0                       | 0                             | 0                   |
|                                         | probable                  | 0.54 [0.27;0.81] **            | 0.48 [0.20;0.76] **         | 0.52 [0.24;0.79] **     | 0.39 [0.12;0.65] **           | 0.38 [0.11;0.65] ** |
|                                         | definite                  | 0.69 [0.28;1.10] **            | 0.59 [0.17;1.02] **         | 0.63 [0.21;1.05] **     | 0.33 [-0.07;0.74]             | 0.36 [-0.06;0.77] † |
| <b>CO-OCCURRING EARLY-LIFE RISKS</b>    |                           |                                |                             |                         |                               |                     |
|                                         | Low birth weight          | 0.26 [-0.30;0.83]              | 0.21 [-0.34;0.77]           | -                       | -                             | 0.27 [-0.26;0.80]   |
|                                         | Child SES                 |                                |                             |                         |                               |                     |
|                                         | <i>low</i>                | 0.69 [0.30;1.09]               | 0.42 [0.01;0.83]            | -                       | -                             | 0.20 [-0.21;0.62]   |
|                                         | <i>medium</i>             | 0.27 [-0.06;0.59]              | 0.20 [-0.14;0.53]           |                         |                               | 0.12 [-0.21;0.44]   |
|                                         | <i>high</i>               | 0                              | 0                           |                         |                               | 0                   |
|                                         | Low child IQ              | 0.59 [0.23;0.95]               | 0.42 [0.05;0.79]            | -                       | -                             | 0.12 [-0.26;0.49]   |
| <b>ADULT STRESS INDICATORS</b>          |                           |                                |                             |                         |                               |                     |
|                                         | SES                       |                                |                             |                         |                               |                     |
|                                         | <i>low</i>                | 0.53 [0.23;0.82]               | -                           | 0.43 [0.14;0.73]        | -                             | 0.15 [-0.16;0.46]   |
|                                         | <i>medium</i>             | 0.11 [-0.18;0.39]              |                             | 0.06 [-0.22;0.35]       |                               | -0.04 [-0.32;0.25]  |
|                                         | <i>high</i>               | 0                              |                             | 0                       |                               | 0                   |
|                                         | Major Depression          | 0.22 [-0.11;0.55]              | -                           | 0.00 [-0.36;0.37]       | -                             | 0.12 [-0.23;0.48]   |
|                                         | High perceived stress     | 0.13 [-0.13;0.40]              | -                           | -0.01 [-0.31;0.28]      | -                             | -0.30 [-0.59;-0.01] |
| <b>ADULT HEALTH AND HEALTH BEHAVIOR</b> |                           |                                |                             |                         |                               |                     |
|                                         | CV risk cluster           | 0.71 [0.39;1.02]               | -                           | -                       | 0.61 [0.31;0.92]              | 0.61 [0.29;0.93]    |
|                                         | Smoking                   |                                |                             |                         |                               |                     |
|                                         | <i>non-smoker</i>         | 0                              | -                           | -                       | 0                             | 0                   |
|                                         | <i>up to 10 / day</i>     | 0.35 [0.04;0.66]               |                             |                         | 0.31 [0.00;0.63]              | 0.29 [-0.03;0.60]   |
|                                         | <i>11 to 20 / day</i>     | 1.03 [0.73;1.34]               |                             |                         | 0.92 [0.61;1.22]              | 0.83 [0.50;1.15]    |
|                                         | <i>more than 20 / day</i> | 1.52 [0.99;2.06]               |                             |                         | 1.47 [0.93;2.01]              | 1.39 [0.84;1.94]    |
|                                         | Physical activity         |                                |                             |                         |                               |                     |
|                                         | <i>light activity</i>     | 0.17 [-0.17;0.51]              | -                           | -                       | 0.18 [-0.16;0.51]             | 0.20 [-0.14;0.55]   |
|                                         | <i>moderate activity</i>  | -0.16 [-0.50;0.18]             |                             |                         | -0.06 [-0.39;0.28]            | -0.05 [-0.39;0.30]  |
|                                         | <i>hard activity</i>      | -0.26 [-0.60;0.07]             |                             |                         | -0.09 [-0.43;0.24]            | -0.11 [-0.45;0.23]  |
|                                         | <i>very hard activity</i> | 0                              |                             |                         | 0                             | 0                   |
|                                         | Diet (fruit,veg intake)   |                                |                             |                         |                               |                     |
|                                         | <i>very low</i>           | 0.60 [0.23;0.96]               | -                           | -                       | 0.49 [0.13;0.84]              | 0.46 [0.09;0.83]    |
|                                         | <i>low</i>                | 0.31 [-0.03;0.65]              |                             |                         | 0.25 [-0.08;0.58]             | 0.25 [-0.09;0.59]   |
|                                         | <i>high</i>               | 0.26 [-0.12;0.65]              |                             |                         | 0.16 [-0.21;0.52]             | 0.14 [-0.23;0.52]   |
|                                         | <i>very high</i>          | 0                              |                             |                         | 0                             | 0                   |
| <b>OTHERS</b>                           |                           |                                |                             |                         |                               |                     |
|                                         | Male sex                  | -0.27 [-0.51;-0.03]            | -0.24 [-0.48;0.00]          | -0.24 [-0.48;0.00]      | -0.40 [-0.64;-0.16]           | -0.38 [-0.63;-0.13] |
|                                         | Use of anti-inflammatory  | 0.07 [-0.20;0.33]              | 0.06 [-0.21;0.32]           | 0.15 [-0.11;0.41]       | 0.16 [-0.09;0.40]             | 0.15 [-0.10;0.41]   |

\*\* , P < 0.01; \* , P < 0.05; † , P < 0.10
