# Supplementary material
Source: PubMed Central journal article supplement (PMC1783123)
Supplement: pnas_0610362104_3.pdf [file pnas_0610362104_3.pdf]

**Table 5. Regression coefficients and 95% confidence intervals from the linear regression models predicting the inflammation factor**

|                                         |                           | BASELINE<br>Bivariate analysis | MODEL 1<br>Early-Life Risks | MODEL 2<br>Adult Stress | MODEL 3<br>Adult Health/Behav | MODEL 4<br>Full     |
|-----------------------------------------|---------------------------|--------------------------------|-----------------------------|-------------------------|-------------------------------|---------------------|
| <b>CHILDHOOD MALTREATMENT</b>           |                           |                                |                             |                         |                               |                     |
|                                         | no                        | 0                              | 0                           | 0                       | 0                             | 0                   |
|                                         | probable                  | 0.17 [0.02;0.33] *             | 0.14 [-0.02;0.29] †         | 0.17 [0.02;0.32] *      | 0.11 [-0.04;0.25]             | 0.07 [-0.08;0.22]   |
|                                         | definite                  | 0.41 [0.18;0.64] **            | 0.32 [0.09;0.56] **         | 0.36 [0.13;0.59] **     | 0.28 [0.06;0.50] *            | 0.23 [0.01;0.46] *  |
| <b>CO-OCCURRING EARLY-LIFE RISKS</b>    |                           |                                |                             |                         |                               |                     |
|                                         | Low birth weight          | 0.30 [-0.02;0.61]              | 0.22 [-0.08;0.53]           | -                       | -                             | 0.23 [-0.06;0.52]   |
|                                         | Child SES                 |                                |                             |                         |                               |                     |
|                                         | <i>low</i>                | 0.51 [0.29;0.73]               | 0.41 [0.18;0.64]            | -                       | -                             | 0.25 [0.02;0.47]    |
|                                         | <i>medium</i>             | 0.23 [0.05;0.42]               | 0.22 [0.03;0.40]            |                         |                               | 0.16 [-0.01;0.34]   |
|                                         | <i>high</i>               | 0                              | 0                           |                         |                               | 0                   |
|                                         | Low child IQ              | 0.22 [0.02;0.42]               | 0.13 [-0.08;0.33]           | -                       | -                             | 0.00 [-0.21;0.20]   |
| <b>ADULT STRESS INDICATORS</b>          |                           |                                |                             |                         |                               |                     |
|                                         | SES                       |                                |                             |                         |                               |                     |
|                                         | <i>low</i>                | 0.27 [0.10;0.43]               | -                           | 0.21 [0.04;0.37]        | -                             | 0.11 [-0.06;0.28]   |
|                                         | <i>medium</i>             | 0.08 [-0.08;0.24]              |                             | 0.07 [-0.09;0.23]       |                               | 0.02 [-0.13;0.17]   |
|                                         | <i>high</i>               | 0                              |                             | 0                       |                               | 0                   |
|                                         | Major Depression          | 0.18 [0.00;0.36]               | -                           | 0.04 [-0.16;0.24]       | -                             | 0.1 [-0.09;0.30]    |
|                                         | High perceived stress     | 0.17 [0.02;0.32]               | -                           | 0.07 [-0.09;0.23]       | -                             | -0.03 [-0.19;0.13]  |
| <b>ADULT HEALTH AND HEALTH BEHAVIOR</b> |                           |                                |                             |                         |                               |                     |
|                                         | CV risk cluster           | 0.87 [0.70;1.04]               | -                           | -                       | 0.87 [0.70;1.03]              | 0.86 [0.68;1.03]    |
|                                         | Smoking                   |                                |                             |                         |                               |                     |
|                                         | <i>non-smoker</i>         | 0                              | -                           | -                       | 0                             | 0                   |
|                                         | <i>up to 10 / day</i>     | 0.03 [-0.15;0.21]              |                             |                         | 0.07 [-0.10;0.24]             | 0.06 [-0.11;0.24]   |
|                                         | <i>11 to 20 / day</i>     | 0.21 [0.03;0.39]               |                             |                         | 0.16 [-0.01;0.33]             | 0.13 [-0.05;0.31]   |
|                                         | <i>more than 20 / day</i> | 0.54 [0.23;0.84]               |                             |                         | 0.56 [0.27;0.85]              | 0.49 [0.19;0.79]    |
|                                         | Physical activity         |                                |                             |                         |                               |                     |
|                                         | <i>light activity</i>     | 0.28 [0.09;0.47]               | -                           | -                       | 0.18 [0.00;0.36]              | 0.21 [0.03;0.40]    |
|                                         | <i>moderate activity</i>  | 0.13 [-0.05;0.32]              |                             |                         | 0.05 [-0.13;0.23]             | 0.09 [-0.09;0.28]   |
|                                         | <i>hard activity</i>      | 0.05 [-0.13;0.24]              |                             |                         | 0.03 [-0.15;0.21]             | 0.05 [-0.14;0.24]   |
|                                         | <i>very hard activity</i> | 0                              |                             |                         | 0                             | 0                   |
|                                         | Diet (fruit,veg intake)   |                                |                             |                         |                               |                     |
|                                         | <i>very low</i>           | 0.09 [-0.11;0.30]              | -                           | -                       | 0.08 [-0.12;0.27]             | 0.08 [-0.12;0.28]   |
|                                         | <i>low</i>                | 0.03 [-0.16;0.23]              |                             |                         | 0.04 [-0.14;0.22]             | 0.06 [-0.13;0.24]   |
|                                         | <i>high</i>               | 0.10 [-0.11;0.32]              |                             |                         | 0.04 [-0.16;0.24]             | 0.08 [-0.12;0.28]   |
|                                         | <i>very high</i>          | 0                              |                             |                         | 0                             | 0                   |
| <b>OTHERS</b>                           |                           |                                |                             |                         |                               |                     |
|                                         | Male sex                  | -0.35 [-0.48;-0.22]            | -0.30 [-0.44;-0.17]         | -0.31 [-0.44;-0.18]     | -0.37 [-0.50;-0.24]           | -0.31 [-0.44;-0.17] |
|                                         | Use of anti-inflammatory  | 0.18 [0.03;0.32]               | 0.17 [0.03;0.32]            | 0.20 [0.06;0.35]        | 0.19 [0.06;0.33]              | 0.21 [0.07;0.34]    |

\*\* , P < 0.01; \* , P < 0.05; † , P < 0.10
